# Supplementary material
Source: publisher figshare collection journal article supplement (https://tandf.figshare.com/ndownloader/files/17470805)
Supplement: Supplementary file 1 [file 17470805]

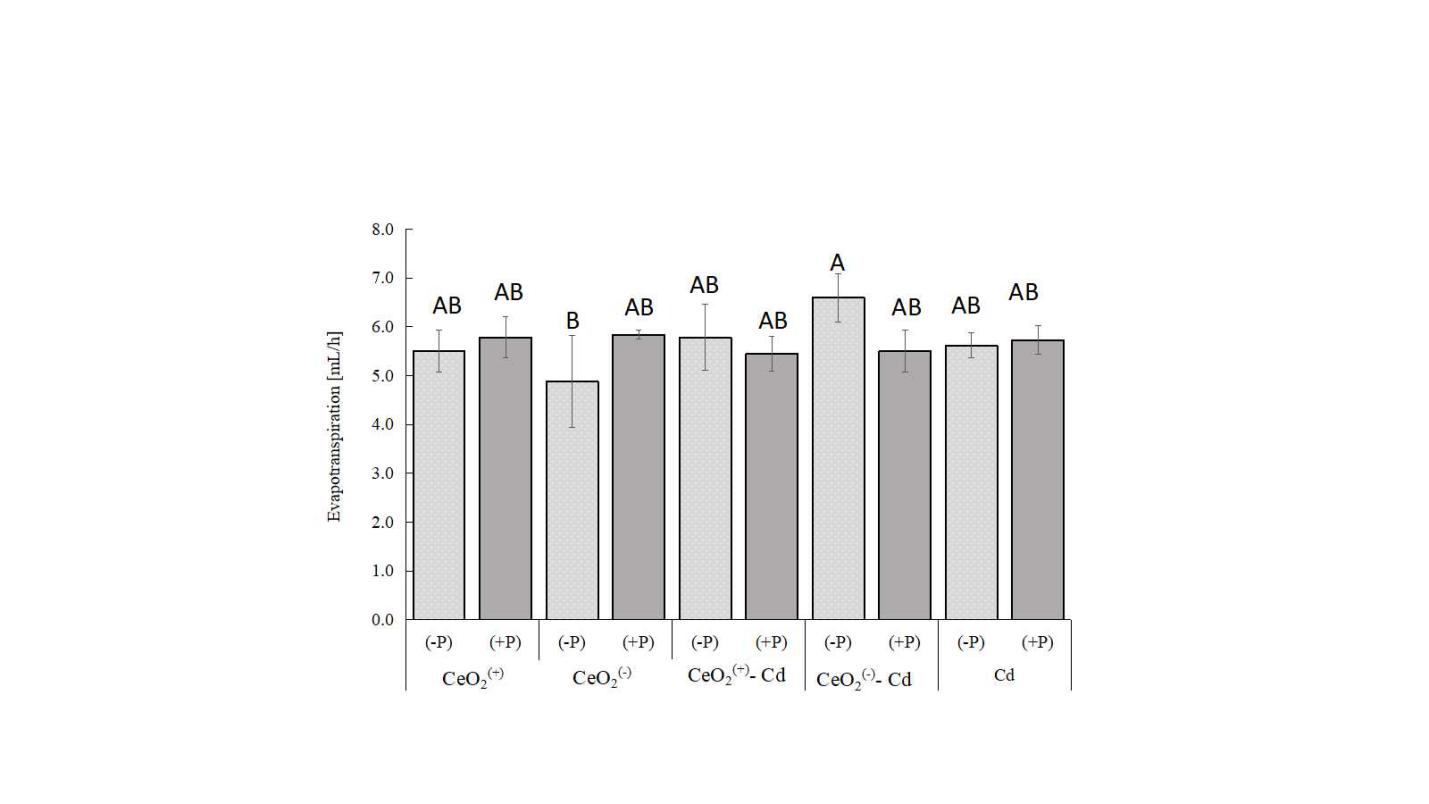


**Figure S1:** Accumulative transpiration of soybean seedlings exposed to 1.0 mg L−1 Cd and 100 mg L−1 CeO2NPs(+) or CeO2NPs(-) separately orin combination. (-P) and (+P) indicates the absence and presence of 50 mg L-1 of phosphate in the growth media. Different letters above each column indicate significant differences by Tukey’s post hoc test (p < 0.05) and the error bars represent standard deviation (n = 3).
